# Supplementary material
Source: Research Square preprint supplement (doi:10.21203/rs.3.rs-9640601/v1)
Supplement: Supplementary file 1 [file e9955ac1b70ea599d03194b4.docx]

**A Comprehensive Psychometric Assessment of Spider Fear Scales in a Chinese Sample**

**Supplementary Material**

**Table S1 ….**SPQ-18, SPQ-13 and SPQ-12 in English and Chinese

**Table S2 ….** FSQ in English and Chinese

**Table S3 ….** Data normality and item statistics of sample groups

**Fig. S1 ….** Scree Plot with Parallel Analysis of SPQ-31 and SPQ-15

**Table S4 ….** Results of the scree test and parallel analysis

**Table S5 ….** Factor loading of SPQ-18, SPQ-13, and FSQ-13

**Table S6 ….** Measurement invariance from multigroup CFA analysis across gender and age

**Table S7 ….** Scale descriptives and internal consistency reliability

**Table S8 ….** Item-to-item correlations of SPQ-18

**Table S9 ….** Item-to-item correlations of SPQ-13

**Table S10 ….** Item-to-item correlations of SPQ-12

**Table S11 ….** Item-to-item correlations of FSQ-13

**Table S12 ….** Test-retest reliability of the three SPQ and the FSQ scales

**Table S13** **….** Correlations between SPQ-18, SPQ-13, SPQ-12 and FSQ-13 scales

**Table S14 ….** Floor and ceiling effect of SPQ-18, SPQ-13, SPQ-12 and FSQ-13 scales

**Table S15 ….** Statistical results and central tendencies on all SPQ and FSQ scales divided by gender and age group

**Table S1** SPQ-18, SPQ-13 and SPQ-12 in English and Chinese

| Item  Code | English | Chinese | SPQ-18 | SPQ-13 | SPQ-12 |
| --- | --- | --- | --- | --- | --- |
| 1 | I avoid going to parts or on camping trips because there may be spiders about. | 我避免去公園或露營，因為那裡可能會有蜘蛛出現 | ✓ |  | ✓ |
| 2 | I would feel some anxiety holding a toy spider in my hand. | 我拿著玩具蜘蛛在手上，會感到有點焦慮 |  | ✓ |  |
| 3 | If a picture of a spider crawling on a person appears on the screen during a motion picture, I turn my head away. | 如果在電影中出現蜘蛛在人身上爬行的畫面，我會轉過頭來避開 | ✓ |  | ✓ |
| 4 | I dislike looking at pictures of spiders in a magazine. | 我不喜歡在雜誌上看到蜘蛛的照片 |  | ✓ | ✓ |
| 5 | If there is a spider on the ceiling over my bed, I cannot go to sleep unless someone kills it for me. | 如果我在床上看到蜘蛛在天花板上，我會無法入睡，直至有人將牠殺死 | ✓ | ✓ | ✓ |
| 6 | I enjoy watching spiders build their webs. | 我享受觀看蜘蛛織網 | ✓ |  |  |
| 7 | I am terrified by the thought of touching a harmless spider. | 一想到要觸摸一隻無害的蜘蛛，我就感到十分恐懼 | ✓ | ✓ | ✓ |
| 8 | If someone says that there are spiders anywhere about, I become alert and edgy. | 如果有人說附近某些地方有蜘蛛，我會變得警惕和緊張不安 | ✓ | ✓ |  |
| 9 | I would not go down to the basement to get something if I thought there might be spiders down there. | 如果我認為地下室可能有蜘蛛，我就不會到那裡去拿東西 |  | ✓ | ✓ |
| 10 | I would feel uncomfortable if a spider crawled out of my shoe as I took it out of the closet to put it on. | 如果我把鞋子從櫃子中拿出來穿時，一隻蜘蛛從我的鞋裡爬出來，我會感到不自在 | ✓ | ✓ | ✓ |
| 11 | When I see a spider, I feel tense and restless. | 當我見到蜘蛛時，我會感到緊張及坐立不安 | ✓ | ✓ |  |
| 12 | I enjoy reading articles about spiders. | 我享受閱讀有關蜘蛛的文章 | ✓ |  |  |
| 13 | I feel sick when I see a spider. | 當我見到蜘蛛時，我感到噁心 |  | ✓ | ✓ |
| 14 | Spiders are sometimes useful. | 蜘蛛有時候是有用的 | ✓ |  |  |
| 15 | I shudder when I think of spiders | 當我想到蜘蛛的時候，我會發抖 |  | ✓ |  |
| 16 | I don’t mind being near a harmless spider if there is someone there in whom I have confidence. | 如果我在信任的人陪同下，我不介意在一隻無害的蜘蛛附近 | ✓ |  |  |
| 17 | Some spiders are very attractive to look at. | 有些蜘蛛是十分吸引人觀賞的 | ✓ |  |  |
| 18 | I don’t believe anyone could hold a spider without some fear. | 我不相信任何人能夠毫無恐懼地捧著一隻蜘蛛 | ✓ |  |  |
| 19 | The way spiders move is repulsive. | 蜘蛛移動的方式令人反感 |  | ✓ |  |
| 20 | It would not bother me to touch a dead spider with a long stick. | 我不介意用長棍觸碰一隻死了的蜘蛛 | ✓ |  |  |
| 21 | If I came upon a spider while cleaning the attic I would probably run. | 如果我在打掃時遇到一隻蜘蛛，我應該會跑走 |  | ✓ | ✓ |
| 22 | I am probably more afraid of spiders than of any other animals. | 比起其他動物，我更怕蜘蛛 | ✓ |  |  |
| 23 | I would not want to travel to Mexico or Central America because of the greater prevalence of tarantulas. | 因為狼蛛在墨西哥或中美洲很常見，所以我不想到當地旅遊 | ✓ |  |  |
| 24 | I am cautious when buying fruit because bananas may attract spiders. | 我在購買生果時會特別小心，因為香蕉會吸引蜘蛛 |  |  |  |
| 25 | I have no fear of non-poisonous spiders. | 我不懼怕無毒的蜘蛛 |  |  |  |
| 26 | I would not take a course in biology if I thought I might have to handle live spiders. | 如果我認為有機會要處理活蜘蛛，我就不會選讀生物課 |  |  | ✓ |
| 27 | Spider webs are very artistic. | 蜘蛛網是很有藝術感的 | ✓ |  |  |
| 28 | I think that I am no more afraid of spiders than the average person. | 我認為我比其他人不會更害怕蜘蛛 |  |  |  |
| 29 | I would prefer not to finish a story if something about spiders was introduced in the plot. | 如果故事情節中引入了有關蜘蛛的內容，我會選擇不繼續閱讀整個故事 |  |  | ✓ |
| 30 | Not only am I afraid of spiders but millipedes and caterpillars make me feel anxious. | 我不僅害怕蜘蛛，千足蟲和毛蟲也讓我感到焦慮 | ✓ |  | ✓ |
| 31 | Even if I was late for a very important appointment, the thought of spiders would stop me from taking a shortcut through an underpass. | 即使我已經在一個非常重要的約會中遲到，一想到蜘蛛就會阻止我走一條要經過行人隧道的捷徑 |  | ✓ |  |

**Table S2** FSQ in English and Chinese

| Item  Code | English | Chinese | FSQ-13 |
| --- | --- | --- | --- |
| 1 | If I came across a spider now, I would get help from someone else to remove it. | 如果我遇到一隻蜘蛛，我會找人幫忙拿走牠 | ✓ |
| 2 | Currently, I am sometimes on the look out for spiders. | 我現在有時會留意有沒有蜘蛛出沒 | ✓ |
| 3 | If I saw a spider now, I would think it will harm me. | 如果我現在看到一隻蜘蛛，我會認為牠會傷害我 |  |
| 4 | I now think a lot about spiders. | 我正在想很多關於蜘蛛的事 | ✓ |
| 5 | I would be somewhat afraid to enter a room now, where I have seen a spider before. | 我現在有點害怕進入一個我曾經見過蜘蛛的房間 |  |
| 6 | I now would do anything to try to avoid a spider. | 我現在會做任何事情來避開蜘蛛 |  |
| 7 | Currently, I sometimes think about getting bit by a spider. | 我現在有時會想到被蜘蛛咬 | ✓ |
| 8 | If I encountered a spider now, I wouldn't be able to deal effectively with it. | 如果我現在遇上一隻蜘蛛，我不能夠有效地應付牠 | ✓ |
| 9 | If I encountered a spider now, it would take a long time to get it out of my mind. | 如果我現在遇上一隻蜘蛛，我需要花很多時間去忘記牠 |  |
| 10 | If I came across a spider now, I would leave the room. | 如果我現在遇上一隻蜘蛛，我會離開該房間 | ✓ |
| 11 | If I saw a spider now, I would think it will try to jump on me. | 如果我現在見到一隻蜘蛛，我會想到牠可能會跳上我身上 | ✓ |
| 12 | If I saw a spider now, 1 would ask someone else to kill it. | 如果我現在見到一隻蜘蛛，我會請別人殺死牠 | ✓ |
| 13 | If I encountered a spider now, I would have images of it trying to get me. | 如果我現在遇上一隻蜘蛛，我腦海中會有牠嘗試傷害我的畫面 |  |
| 14 | If I saw a spider now I would be afraid of it. | 如果我現在見到一隻蜘蛛，我會害怕牠 | ✓ |
| 15 | If I saw a spider now, I would feel very panicky. | 如果我現在見到一隻蜘蛛，我會感到驚慌失措 | ✓ |
| 16 | Spiders are one of my worst fears. | 蜘蛛是我最懼怕的東西之一 | ✓ |
| 17 | I would feel very nervous if I saw a spider now. | 如果我現在見到一隻蜘蛛，我會感到十分緊張 | ✓ |
| 18 | If I saw a spider now I would probably break out in a sweat and my heart would beat faster. | 如果我現在見到一隻蜘蛛，我應該會冒汗和心跳加速 | ✓ |

**Table S3** Data normality and item statistics of sample groups

| Item | Sample 1 (*n*1 = 478)  for SPQ-31 Validation | | | | Sample 2 (*n*2 = 476)  for SPQ-15 Validation | | | | Total sample (N = 1,430)  For FSQ Validation | | | |
| --- | --- | --- | --- | --- | --- | --- | --- | --- | --- | --- | --- | --- |
| *M* | *SD* | Skewness  -2 to +2 | Kurtosis  -7 to +7 | *M* | *SD* | Skewness  -2 to +2 | Kurtosis  -7 to +7 | *M* | *SD* | Skewness  -2 to +2 | Kurtosis  -7 to +7 |
| 1 | 0.15 | 0.36 | 1.91 | 1.67 | 0.13 | 0.33 | 2.26 | 3.123 | 4.23 | 2.044 | -0.146 | -1.224 |
| 2 | 0.32 | 0.47 | 0.78 | -1.39 | 0.34 | 0.47 | 0.68 | -1.55 | 3.07 | 1.788 | 0.546 | -0.732 |
| 3 | 0.2 | 0.4 | 1.52 | 0.3 |  |  |  |  | 3.00 | 1.72 | 0.622 | -0.46 |
| 4 | 0.35 | 0.48 | 0.62 | -1.63 | 0.34 | 0.47 | 0.69 | -1.54 | 2.67 | 1.725 | 0.847 | -0.244 |
| 5 | 0.64 | 0.48 | -0.61 | -1.64 | 0.64 | 0.48 | -0.6 | -1.65 | 2.71 | 1.716 | 0.818 | -0.295 |
| 6 | 0.69 | 0.46 | -0.83 | -1.32 |  |  |  |  | 2.70 | 1.691 | 0.849 | -0.106 |
| 7 | 0.64 | 0.48 | -0.57 | -1.69 | 0.6 | 0.49 | -0.41 | -1.84 | 1.98 | 1.398 | 1.607 | 2.07 |
| 8 | 0.53 | 0.5 | -0.13 | -1.99 | 0.48 | 0.5 | 0.67 | -2 | 3.51 | 1.942 | 0.307 | -1.079 |
| 9 | 0.46 | 0.5 | 0.18 | -1.98 | 0.41 | 0.49 | 0.38 | -1.87 | 2.65 | 1.724 | 0.913 | -0.13 |
| 10 | 0.85 | 0.36 | -1.94 | 1.76 | 0.79 | 0.41 | -1.46 | 0.13 | 3.60 | 2.065 | 0.222 | -1.257 |
| 11 | 0.54 | 0.5 | -0.16 | -1.98 | 0.5 | 0.5 | 0 | -2.01 | 3.72 | 1.945 | 0.146 | -1.156 |
| 12 | 0.8 | 0.4 | -1.48 | 0.2 |  |  |  |  | 3.71 | 2.147 | 0.186 | -1.335 |
| 13 | 0.46 | 0.5 | 0.17 | -1.98 | 0.44 | 0.5 | 0.25 | -1.95 | 2.69 | 1.753 | 0.891 | -0.229 |
| 14 | 0.23 | 0.42 | 1.3 | -0.31 |  |  |  |  | 3.89 | 2.064 | 0.041 | -1.285 |
| 15 | 0.17 | 0.38 | 1.75 | 1.06 | 0.15 | 0.36 | 1.95 | 1.82 | 3.63 | 2.068 | 0.24 | -1.245 |
| 16 | 0.32 | 0.47 | 0.75 | -1.44 |  |  |  |  | 3.18 | 2.002 | 0.501 | -1.011 |
| 17 | 0.51 | 0.5 | -0.06 | -2.01 |  |  |  |  | 3.58 | 2.01 | 0.233 | -1.202 |
| 18 | 0.2 | 0.4 | 1.52 | 0.3 |  |  |  |  | 2.92 | 1.89 | 0.686 | -0.692 |
| 19 | 0.35 | 0.48 | 0.65 | -1.58 | 0.36 | 0.48 | 0.58 | -1.67 |  |  |  |  |
| 20 | 0.27 | 0.45 | 1.02 | -0.97 |  |  |  |  |  |  |  |  |
| 21 | 0.4 | 0.49 | 0.41 | -1.84 | 0.34 | 0.48 | 0.66 | -1.56 |  |  |  |  |
| 22 | 0.19 | 0.39 | 1.6 | 0.56 |  |  |  |  |  |  |  |  |
| 23 | 0.2 | 0.4 | 1.52 | 0.3 |  |  |  |  |  |  |  |  |
| 24 | 0.09 | 0.29 | 2.79 | 5.8 |  |  |  |  |  |  |  |  |
| 25 | 0.58 | 0.49 | -0.32 | -1.9 |  |  |  |  |  |  |  |  |
| 26 | 0.28 | 0.45 | 0.96 | -1.09 |  |  |  |  |  |  |  |  |
| 27 | 0.41 | 0.49 | 0.35 | -1.89 |  |  |  |  |  |  |  |  |
| 28 | 0.56 | 0.5 | -0.23 | -1.96 |  |  |  |  |  |  |  |  |
| 29 | 0.1 | 0.3 | 2.71 | 5.35 | 0.07 | 0.25 | 3.47 | 10.07 |  |  |  |  |
| 30 | 0.6 | 0.49 | -0.4 | -1.85 |  |  |  |  |  |  |  |  |
| 31 | 0.22 | 0.42 | 1.33 | -0.23 | 0.17 | 0.37 | 1.8 | 1.25 |  |  |  |  |


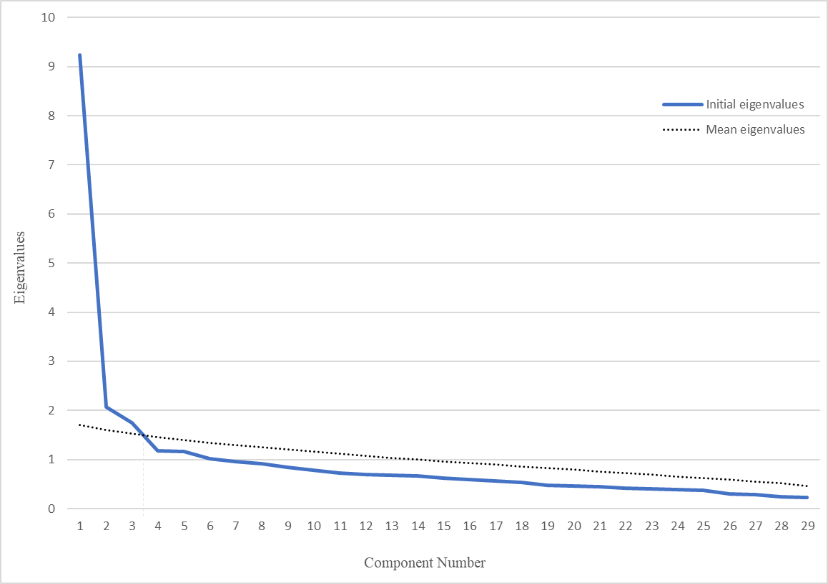


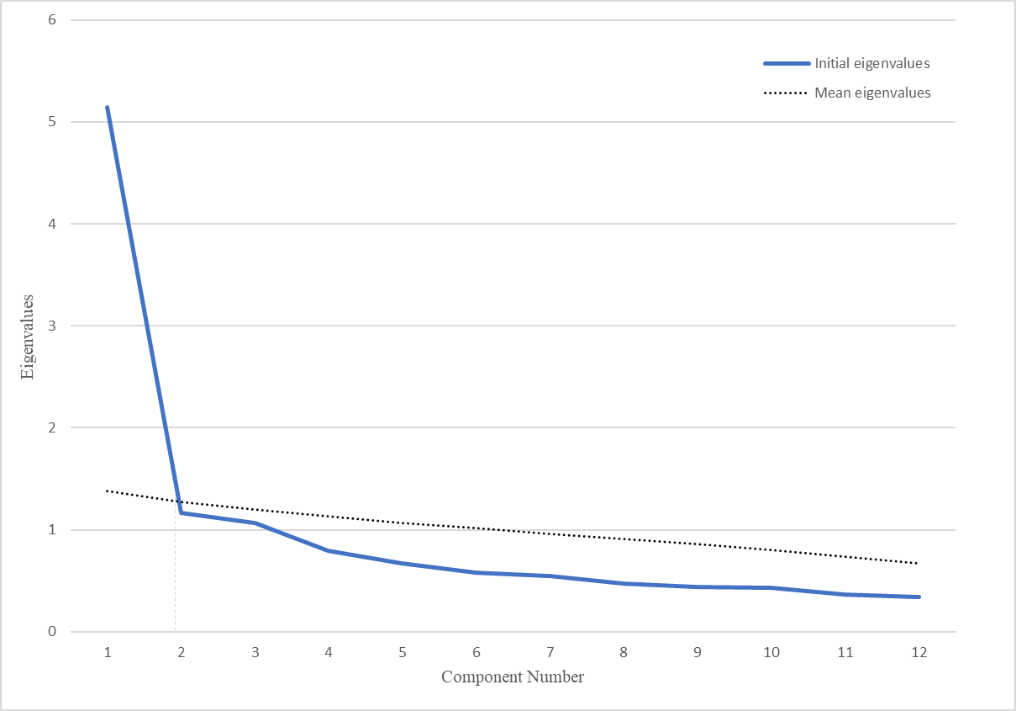


**Fig. S1** Scree Plot with Parallel Analysis of SPQ-31 (top) and SPQ-15 (bottom)

**Table S4** Results of the scree test and parallel analysis (*n*1a = 239, *n*2a = 238)

| Component Number | SPQ-31 (*n*1a = 239) | | | | SPQ-15 (*n*2a = 238) | | | | FSQ (*n*4a = 715) | | | |
| --- | --- | --- | --- | --- | --- | --- | --- | --- | --- | --- | --- | --- |
| Scree test | | Parallel Analysis | | Scree test | | Parallel Analysis | | Scree test | | Parallel Analysis | |
| Initial Eigenvalues | % of variance | Mean Eigenvalues | Percentile eigenvalues | Initial Eigenvalues | % of variance | Mean Eigenvalues | Percentile eigenvalues | Initial Eigenvalues | % of variance | Mean Eigenvalues | Percentile eigenvalues |
| 1 | 9.241 | 31.867 | 1.703 | 1.791 | 5.695 | 43.807 | 1.453 | 1.544 | 10.553 | 58.826 | 1.286 | 1.343 |
| 2 | 2.068 | 7.133 | 1.597 | 1.667 | 1.177 | 9.052 | 1.343 | 1.408 | 1.590 | 8.832 | 1.228 | 1.261 |
| 3 | 1.754 | 6.047 | 1.527 | 1.581 | 1.069 | 8.222 | 1.269 | 1.319 | 0.804 | 4.466 | 1.189 | 1.219 |
| 4 | 1.178 | 4.064 | 1.458 | 1.511 | 0.804 | 6.182 | 1.199 | 1.247 | 0.712 | 3.953 | 1.153 | 1.180 |
| 5 | 1.156 | 3.985 | 1.404 | 1.456 | 0.688 | 5.296 | 1.143 | 1.188 | 0.593 | 3.295 | 1.124 | 1.151 |
| 6 | 1.020 | 3.518 | 1.344 | 1.389 | 0.579 | 4.455 | 1.088 | 1.066 | 0.521 | 2.896 | 1.091 | 1.114 |

**Table S5** Factor loading of SPQ-18, SPQ-13, and FSQ-13

| SPQ-18 | | | | SPQ-13 | | FSQ-13 | | |
| --- | --- | --- | --- | --- | --- | --- | --- | --- |
| Item code  (from SPQ-31) | Component 1 | Component 2 | Component 3 | Item code  (from SPQ-31) | Factor loading | Item code  (from FSQ-18) | Component 1 | Component 2 |
| 30 | **.776** |  |  | 8 | **.780** | 15 | **.916** |  |
| 5 | **.730** |  |  | 11 | **.775** | 14 | **.915** |  |
| 7 | **.711** |  |  | 9 | **.769** | 17 | **.893** |  |
| 11 | **.707** |  | .311 | 13 | **.765** | 10 | **.863** |  |
| 8 | **.678** |  | .328 | 21 | **.671** | 12 | **.834** |  |
| 10 | **.650** |  |  | 4 | **.656** | 8 | **.824** |  |
| 17 |  | **.732** |  | 15 | **.644** | 18 | **.802** | .305 |
| 6 |  | **.689** |  | 5 | **.633** | 16 | **.791** |  |
| 27 |  | **.670** |  | 19 | **.624** | 1 | **.778** |  |
| 14 |  | **.614** |  | 7 | **.611** | 11 | **.730** |  |
| 16 |  | **.580** |  | 31 | **.578** | 4 |  | **.769** |
| 12 |  | **.554** |  | 2 | **.516** | 7 |  | **.731** |
| 23 |  |  | **.705** | 10 | **.500** | 2 | .318 | **.654** |
| 1 |  |  | **.638** | / | / | / | / | / |
| 3 |  |  | **.611** | / | / | / | / | / |
| 18 |  |  | **.557** | / | / | / | / | / |
| 20 |  |  | **.457** | / | / | / | / | / |
| 22 |  |  | **.428** | / | / | / | / | / |

**Table S6** Measurement invariance from multigroup CFA analysis across gender and age

|  | SPQ-18  (*n*1b = 239) | | | SPQ-13  (*n*2b = 238) | | | SPQ-12  (*n*3 = 476) | | | FSQ-13  (*n4b* = 715) | | |
| --- | --- | --- | --- | --- | --- | --- | --- | --- | --- | --- | --- | --- |
|  | Configural invariance | Metric invariance | Scalar invariance | Configural invariance | Metric invariance | Scalar invariance | Configural invariance | Metric invariance | Scalar invariance | Configural invariance | Metric invariance | Scalar invariance |
| **Gender** |  |  |  |  |  |  |  |  |  |  |  |  |
| SRMR | 0.1051 | 0.1064 | 0.1082 | 0.0745 | 0.0985 | 0.101 | 0.0760 | 0.0867 | 0.0832 | 0.0608 | 0.0630 | 0.0735 |
| |ΔSRMR| | / | 0.0013 | 0.0049 | / | 0.024 | 0.0265 | / | 0.0107 | 0.0072 |  | 0.0022 | 0.0127 |
| RMSEA | 0.046 | 0.046 | 0.049 | 0.062 | 0.063 | 0.059 | 0.053 | 0.051 | 0.062 | 0.063 | 0.061 | 0.060 |
| |ΔRMSEA| | / | 0 | 0.003 | / | 0.001 | 0.003 | / | 0.002 | 0.009 |  | 0.002 | 0.003 |
| CFI | 0.865 | 0.863 | 0.828 | 0.891 | 0.880 | 0.881 | 0.906 | 0.906 | 0.844 | 0.952 | 0.952 | 0.949 |
| |ΔCFI| | / | 0.002 | 0.037 | / | 0.011 | 0.001 | / | 0 | 0.062 |  | 0 | 0.003 |
| **Age group** |  |  |  |  |  |  |  |  |  |  |  |  |
| SRMR | 0.1140 | 0.1140 | 0.1193 | 0.0835 | 0.0815 | 0.0796 | 0.0684 | 0.0808 | 0.0756 | 0.0513 | 0.0545 | 0.0482 |
| |ΔSRMR| | / | 0 | 0.0053 | / | 0.002 | 0.0039 | / | 0.0124 | 0.0072 |  | 0.0032 | 0.0031 |
| RMSEA | 0.044 | 0.043 | 0.041 | 0.049 | 0.047 | 0.044 | 0.048 | 0.046 | 0.046 | 0.050 | 0.048 | 0.047 |
| |ΔRMSEA| | / | 0.001 | 0.003 | / | 0.002 | 0.005 | / | 0.002 | 0.002 |  | 0.002 | 0.003 |
| CFI | 0.814 | 0.819 | 0.821 | 0.887 | 0.890 | 0.897 | 0.878 | 0.877 | 0.863 | 0.949 | 0.950 | 0.950 |
| |ΔCFI| | / | 0.005 | 0.007 | / | 0.003 | 0.010 | / | 0.001 | 0.015 |  | 0.001 | 0.001 |

Note: Gender as male and female; age groups as 18 to 20, 21 to 30, 30 or above

**Table S7** Scale descriptives and internal consistency reliability

| Scales | Subsample (*n*) | *M* | *SD* | Cronbach’s *α* | McDonald’s *ω* |
| --- | --- | --- | --- | --- | --- |
| SPQ-18 | 1 (*n*1 = 478) | 7.98 | 4.08 | 0.832 | 0.831 |
| SPQ-13 | 2 (*n*2 = 476) | 5.57 | 3.96 | 0.890 | 0.892 |
| SPQ-12 | 3 (*n*3 = 476) | 5.25 | 3.12 | 0.837 | 0.846 |
| FSQ-13 | Total sample | 43.68 | 19.27 | 0.941 | 0.947 |

**Table S8** Item-to-item correlations of SPQ-18 (*n* = 478)

|  | 1 | 2 | 3 | 4 | 5 | 6 | 7 | 8 | 9 | 10 | 11 | 12 | 13 | 14 | 15 | 16 | 17 | 18 |
| --- | --- | --- | --- | --- | --- | --- | --- | --- | --- | --- | --- | --- | --- | --- | --- | --- | --- | --- |
| 1 | - |  |  |  |  |  |  |  |  |  |  |  |  |  |  |  |  |  |
| 3 | .27 | - |  |  |  |  |  |  |  |  |  |  |  |  |  |  |  |  |
| 5 | .22 | .23 | - |  |  |  |  |  |  |  |  |  |  |  |  |  |  |  |
| 6 | .16 | .11 | .24 | - |  |  |  |  |  |  |  |  |  |  |  |  |  |  |
| 7 | .17 | .21 | .30 | .22 | - |  |  |  |  |  |  |  |  |  |  |  |  |  |
| 8 | .32 | .31 | .53 | .30 | .47 | - |  |  |  |  |  |  |  |  |  |  |  |  |
| 10 | .12 | .15 | .38 | .18 | .32 | .36 | - |  |  |  |  |  |  |  |  |  |  |  |
| 11 | .31 | .31 | .50 | .36 | .45 | .66 | .36 | - |  |  |  |  |  |  |  |  |  |  |
| 12 | ~~.07~~ | .13 | .14 | .41 | .19 | .15 | .18 | .15 | - |  |  |  |  |  |  |  |  |  |
| 14 | .15 | ~~.05~~ | .14 | .28 | ~~.04~~ | .12 | ~~.04~~ | .14 | .23 | - |  |  |  |  |  |  |  |  |
| 16 | .14 | .13 | .18 | .24 | .20 | .28 | ~~.05~~ | .30 | .21 | .27 | - |  |  |  |  |  |  |  |
| 17 | .13 | .16 | .21 | .43 | .28 | .23 | .14 | .30 | .35 | .30 | .32 | - |  |  |  |  |  |  |
| 18 | .21 | ~~.05~~ | ~~.05~~ | ~~-.05~~ | ~~.01~~ | ~~.05~~ | ~~.04~~ | ~~.05~~ | ~~-.05~~ | ~~.09~~ | ~~.03~~ | ~~-.05~~ | - |  |  |  |  |  |
| 20 | .19 | .21 | .11 | .11 | .14 | .21 | ~~.05~~ | .21 | ~~.05~~ | .12 | .22 | .10 | ~~.05~~ | - |  |  |  |  |
| 22 | .21 | .31 | .28 | .14 | .19 | .29 | .14 | .33 | ~~.08~~ | .12 | .17 | .19 | .15 | .14 | - |  |  |  |
| 23 | .38 | .28 | .28 | .13 | .15 | .29 | ~~.04~~ | .27 | ~~.04~~ | ~~.08~~ | .22 | .12 | .17 | .19 | .28 | - |  |  |
| 27 | .17 | .14 | .15 | .42 | .22 | .19 | ~~.00~~ | .27 | .25 | .26 | .31 | .49 | ~~.02~~ | .17 | .20 | .14 | - |  |
| 31 | .41 | .30 | .34 | .18 | .30 | .42 | .12 | .55 | .20 | ~~.07~~ | .21 | .31 | .~~06~~ | ~~.08~~ | .30 | .22 | .19 | - |

*Note: The first column shows the original number code of SPQ-18 from SPQ-31; the first row shows the new number code of SPQ-18*

**Table S9** Item-to-item correlations of SPQ-13 (*n* = 476)

|  | 1 | 2 | 3 | 4 | 5 | 6 | 7 | 8 | 9 | 10 | 11 | 12 | 13 |
| --- | --- | --- | --- | --- | --- | --- | --- | --- | --- | --- | --- | --- | --- |
| 2 | - |  |  |  |  |  |  |  |  |  |  |  |  |
| 4 | .45 | - |  |  |  |  |  |  |  |  |  |  |  |
| 5 | .23 | .32 | - |  |  |  |  |  |  |  |  |  |  |
| 7 | .27 | .43 | .45 | - |  |  |  |  |  |  |  |  |  |
| 8 | .28 | .41 | .48 | .48 | - |  |  |  |  |  |  |  |  |
| 9 | .29 | .44 | .43 | .40 | .52 | - |  |  |  |  |  |  |  |
| 10 | .19 | .27 | .43 | .38 | .43 | .35 | - |  |  |  |  |  |  |
| 11 | .35 | .40 | .47 | .45 | .68 | .55 | .41 | - |  |  |  |  |  |
| 13 | .38 | .45 | .41 | .40 | .49 | .47 | .35 | .56 | - |  |  |  |  |
| 15 | .30 | .35 | .22 | .24 | .37 | .39 | .14 | .36 | .43 | - |  |  |  |
| 19 | .35 | .40 | .31 | .33 | .40 | .36 | .25 | .39 | .55 | .39 | - |  |  |
| 21 | .26 | .34 | .40 | .34 | .51 | .51 | .32 | .54 | .43 | .38 | .36 | - |  |
| 31 | .28 | .29 | .26 | .27 | .38 | .45 | .16 | .41 | .35 | .43 | .29 | .42 | - |

*Note: The first column shows the original number code of SPQ-13 from SPQ-31; the first row shows the new number code of SPQ-13*

**Table S10** Item-to-item correlations of SPQ-12 (*n* = 476)

|  | 1 | 2 | 3 | 4 | 5 | 6 | 7 | 8 | 9 | 10 | 11 | 12 |
| --- | --- | --- | --- | --- | --- | --- | --- | --- | --- | --- | --- | --- |
| 1 | - |  |  |  |  |  |  |  |  |  |  |  |
| 3 | .21 | - |  |  |  |  |  |  |  |  |  |  |
| 4 | .26 | .42 | - |  |  |  |  |  |  |  |  |  |
| 5 | .24 | .27 | .37 | - |  |  |  |  |  |  |  |  |
| 7 | .24 | .25 | .40 | .37 | - |  |  |  |  |  |  |  |
| 9 | .30 | .30 | .43 | .45 | .45 | - |  |  |  |  |  |  |
| 10 | .14 | .19 | .24 | .36 | .37 | .34 | - |  |  |  |  |  |
| 13 | .32 | .33 | .56 | .47 | .45 | .48 | .31 | - |  |  |  |  |
| 21 | .30 | .34 | .39 | .43 | .38 | .60 | .31 | .47 | - |  |  |  |
| 26 | .26 | .35 | .43 | .26 | .35 | .38 | .22 | .38 | .40 | - |  |  |
| 29 | .21 | .21 | .13 | .14 | .15 | .16 | ~~.06~~ | .19 | .18 | .24 | - |  |
| 30 | .24 | .25 | .35 | .48 | .46 | .44 | .38 | .48 | .43 | .29 | .10 | - |

*Note: The first column of each table shows the original number code of SPQ-18, SPQ-13, and SPQ-12 from SPQ-31, respectively; the first row shows the new number code of SPQ-18, SPQ-13 and SPQ-12*

**Table S11** Item-to-item correlations of FSQ-13 (*N* = 1,430)

|  | 1 | 2 | 3 | 4 | 5 | 6 | 7 | 8 | 9 | 10 | 11 | 12 | 13 |
| --- | --- | --- | --- | --- | --- | --- | --- | --- | --- | --- | --- | --- | --- |
| 1 | - |  |  |  |  |  |  |  |  |  |  |  |  |
| 2 | .28 | - |  |  |  |  |  |  |  |  |  |  |  |
| 4 | .14 | .35 | - |  |  |  |  |  |  |  |  |  |  |
| 7 | .21 | .40 | .37 | - |  |  |  |  |  |  |  |  |  |
| 8 | .64 | .35 | .19 | .29 | - |  |  |  |  |  |  |  |  |
| 10 | .66 | .37 | .15 | .30 | .73 | - |  |  |  |  |  |  |  |
| 11 | .53 | .38 | .21 | .38 | .59 | .66 | - |  |  |  |  |  |  |
| 12 | .70 | .36 | .15 | .26 | .65 | .71 | .61 | - |  |  |  |  |  |
| 14 | .68 | .38 | .18 | .30 | .72 | .77 | .68 | .74 | - |  |  |  |  |
| 15 | .68 | .42 | .20 | .32 | .73 | .78 | .68 | .74 | .90 | - |  |  |  |
| 16 | .60 | .44 | .21 | .36 | .63 | .68 | .61 | .65 | .77 | .78 | - |  |  |
| 17 | .66 | .41 | .21 | .32 | .70 | .78 | .68 | .72 | .86 | .88 | .81 | - |  |
| 18 | .58 | .43 | .23 | .38 | .64 | .69 | .61 | .63 | .73 | .78 | .74 | .83 | - |

*Note: The first column shows the original number code of FSQ; the first row shows the number code of SPQ-18*

**Table S12** Test-retest reliability of the three SPQ and the FSQ scales (*N* = 64, *M*age = 26.12, *SD* = 9.29, %female = 76.6%)

|  | Test  Mean (SD) | Retest  Mean (SD) | Pearson Correlation  between  Test & Retest | Intraclass Correlation  (Average measures) |
| --- | --- | --- | --- | --- |
| SPQ-18 | 8.72 (4.75) | 8.83 (4.69) | 0.90** | 0.95 |
| Component 1: Aggravating visualization | 3.95 (2.04) | 4.02 (2.10) | 0.75** | 0.86 |
| Component 2: Appreciating | 3.39 (2.17) | 3.20 (2.06) | 0.79** | 0.88 |
| Component 3: Avoiding interaction | 1.38 (1.61) | 1.61 (1.65) | 0.77** | 0.87 |
| SPQ-13 | 6.55 (4.37) | 6.81 (4.35) | 0.84** | 0.91 |
| SPQ-12 | 5.61 (3.65) | 5.97 (3.59) | 0.87** | 0.93 |
| FSQ-13 | 47.42 (20.10) | 49.95 (16.31) | 0.77** | 0.97 |
| Component 1: avoidance/help seeking behaviors | 39.16 (17.98) | 41.22 (14.59) | 0.77** | 0.98 |
| Component 2:  Fear of harms | 8.27 (3.69) | 8.73 (3.55) | 0.71** | 0.81 |

*Note: ** p < 0.01*

**Table S13** Correlations between SPQ-18, SPQ-13, SPQ-12 and FSQ-13 scales

|  |  | SPQ-18  (*n*1 = 478) | | | SPQ-13  (*n*2 = 476) | SPQ-12  (*n*3 = 476) | FSQ-13  (N = 1,430) |
| --- | --- | --- | --- | --- | --- | --- | --- |
|  | Total | Aggravating visualisation | Appreciating | Avoiding interaction |
| SPQ-18 | - | - | - | - | - | - | - |
| SPQ18-AgV | .84 | - | - | - | - | - | - |
| SPQ18-Apr | .75 | .41 | - | - | - | - | - |
| SPQ18-AvI | .69 | .44 | .29 | - | - | - | - |
| FSQ-13 | .76 | .72 | .47 | .53 | .80 | .77 | - |
| FSQ-13 Factor 1 | .76 | .74 | .47 | .51 | .80 | .78 | .99 |
| FSQ-13 Factor 2 | .44 | .34 | .26 | .43 | .36 | .32 | .60 |
| FSS-ANI | .58 | .56 | .42 | .30 | .59 | .59 | .59 |
| FSS-INJ | .28 | .27 | .20 | .16 | .31 | .33 | .32 |
| SNAQ-30 | .53 | .38 | .50 | .32 | .48 | .50 | .39 |
| INS | -.24 | -.23 | -.19 | -.10 | -.22 | -.18 | -.19 |

*Note: all coefficients in the table were significant (p < 0.01)*

**Table** **S14** Floor and ceiling effect of SPQ-18, SPQ-13, SPQ-12 and FSQ-13 scales

| Version | *N* | *M* | Median | Lowest score | Highest score | Floor Effect (%) | Ceiling Effect (%) |
| --- | --- | --- | --- | --- | --- | --- | --- |
| SPQ-18 | 478 | 7.98 | 8.00 | 0 | 17 | 0.4 | 1.5 |
| SPQ-13 | 476 | 5.57 | 5.00 | 0 | 13 | 11.8 | 4.2 |
| SPQ-12 | 476 | 4.55 | 5.00 | 0 | 12 | 10.1 | 0.6 |
| FSQ-13 | 1,430 | 43.68 | 19.27 | 13 | 91 | 2.6 | 0.2 |

**Table** **S15** Statistical results and central tendencies on all SPQ and FSQ scales divided by gender and age group

| **Gender** | *N* | Male | | | | Female | | *t* |
| --- | --- | --- | --- | --- | --- | --- | --- | --- |
| *M* | | *SD* | | *M* | *SD* |
| SPQ18 | 478 | 7.08 | | 4.11 | | 8.32 | 4.01 | -2.99** |
| SPQ18 - AgV | 478 | 3.17 | | 2.20 | | 4.04 | 1.98 | -4.16** |
| SPQ18 - Apr | 478 | 2.82 | | 1.88 | | 3.03 | 1.78 | -1.12 |
| SPQ18 - AvI | 478 | 1.10 | | 1.32 | | 1.26 | 1.41 | -1.12 |
| SPQ-13 | 476 | 4.43 | | 3.89 | | 6.03 | 3.90 | -4.05** |
| SPQ-12 | 476 | 3.38 | | 2.96 | | 5.00 | 3.18 | -5.07** |
| FSQ-13 | 1,430 | 37.14 | | 17.51 | | 46.23 | 19.32 | -8.19** |
| FSQ-13 factor 1 | 1,430 | 29.57 | | 15.70 | | 38.45 | 17.22 | -8.98** |
| FSQ-13 factor 2 | 1,430 | 7.58 | | 3.82 | | 7.78 | 3.73 | -0.89 |
| **Age Group** | *N* | Age  20 or below | | Age  21 - 30 | | Age  31 or above | | *F* |
| M | SD | M | SD | M | SD |
| SPQ18 | 478 | 8.35 | 3.84 | 8.20 | 4.28 | 7.10 | 3.87 | 3.61* |
| SPQ18 - AgV | 478 | 4.12 | 2.01 | 3.84 | 2.07 | 3.30 | 2.13 | 5.20** |
| SPQ18 - Apr | 478 | 2.99 | 1.72 | 3.00 | 1.90 | 2.88 | 1.77 | 0.19 |
| SPQ18 - AvI | 478 | 1.23 | 1.37 | 1.36 | 1.46 | 0.92 | 1.22 | 3.73* |
| SPQ-13 | 476 | 6.01 | 3.85 | 5.76 | 4.07 | 4.51 | 3.63 | 4.632* |
| SPQ-12 | 476 | 4.81 | 3.37 | 4.71 | 3.12 | 3.88 | 3.05 | 3.202* |
| FSQ-13 | 1,430 | 47.48 | 18.94 | 44.24 | 19.09 | 37.54 | 18.63 | 25.63** |
| FSQ-13 factor 1 | 1,430 | 39.53 | 17.02 | 36.28 | 17.00 | 30.62 | 16.92 | 25.31** |
| FSQ-13 factor 2 | 1,430 | 7.95 | 3.71 | 7.95 | 3.81 | 6.93 | 3.58 | 9.44** |

*Note: *p < 0.05; ** p < 0.01*
